# Supplementary material for: Improving Health Literacy of Domestic Household Disinfection Use: Readability of Consumer-Facing Information on Domestic Household Disinfectant Products on Sale in the UK—An Infodemiology Study
Source: MDPI journal article supplement (doi:10.3390/hygiene3040036), 2023-12-02
Supplement: s1 [file s1]

**Supplementary File S1:** Summary table of readability formulae used in this study and their associated target scores (for the general public).

Readability formulae available at [www.readable.com](http://www.readable.com)

| Readability Metrics                                | Readability formula                                                                                                                | Target score for texts aiming at the general public                                                                                                                         |
|----------------------------------------------------|------------------------------------------------------------------------------------------------------------------------------------|-----------------------------------------------------------------------------------------------------------------------------------------------------------------------------|
| <b>Flesch-Kincaid Grade Level (FKGL)</b>           | $0.39 (\text{total words} / \text{total sentences}) + 11.8 (\text{total syllables} / \text{total words}) - 15.59$                  | A text aimed at the general audience should have a grade level of 8 or lower. At Grade Level 8, 85% of the general population will be able to read and comprehend the text. |
| <b>Flesch Reading Ease (FRE)</b>                   | $206.835 - 1.015 \times (\text{total words} / \text{total sentences}) - 84.6 \times (\text{total syllables} / \text{total words})$ | A target score of 60 or above.                                                                                                                                              |
| <b>Gunning Fog Index</b>                           | $0.4 \times [(\text{total words} / \text{total sentences}) + 100 \times (\text{complex words} / \text{total words})]$              | Grade level of 8 or below.                                                                                                                                                  |
| <b>Simple Measure of Gobbledygook (SMOG) Index</b> | $3 + \text{square root } \sqrt{\text{polysyllabic count in 30 sentences}}$                                                         | Grade level of 8 or below.                                                                                                                                                  |
